# Supplementary material for: Mechanism of MRX inhibition by Rif2 at telomeres
Source: PubMed Central journal article supplement (PMC8115599; doi:10.1038/s41467-021-23035-w), 2021-05-12
Supplement: 41467_2021_23035_MOESM1_ESM.pdf [file 41467_2021_23035_MOESM1_ESM.pdf]

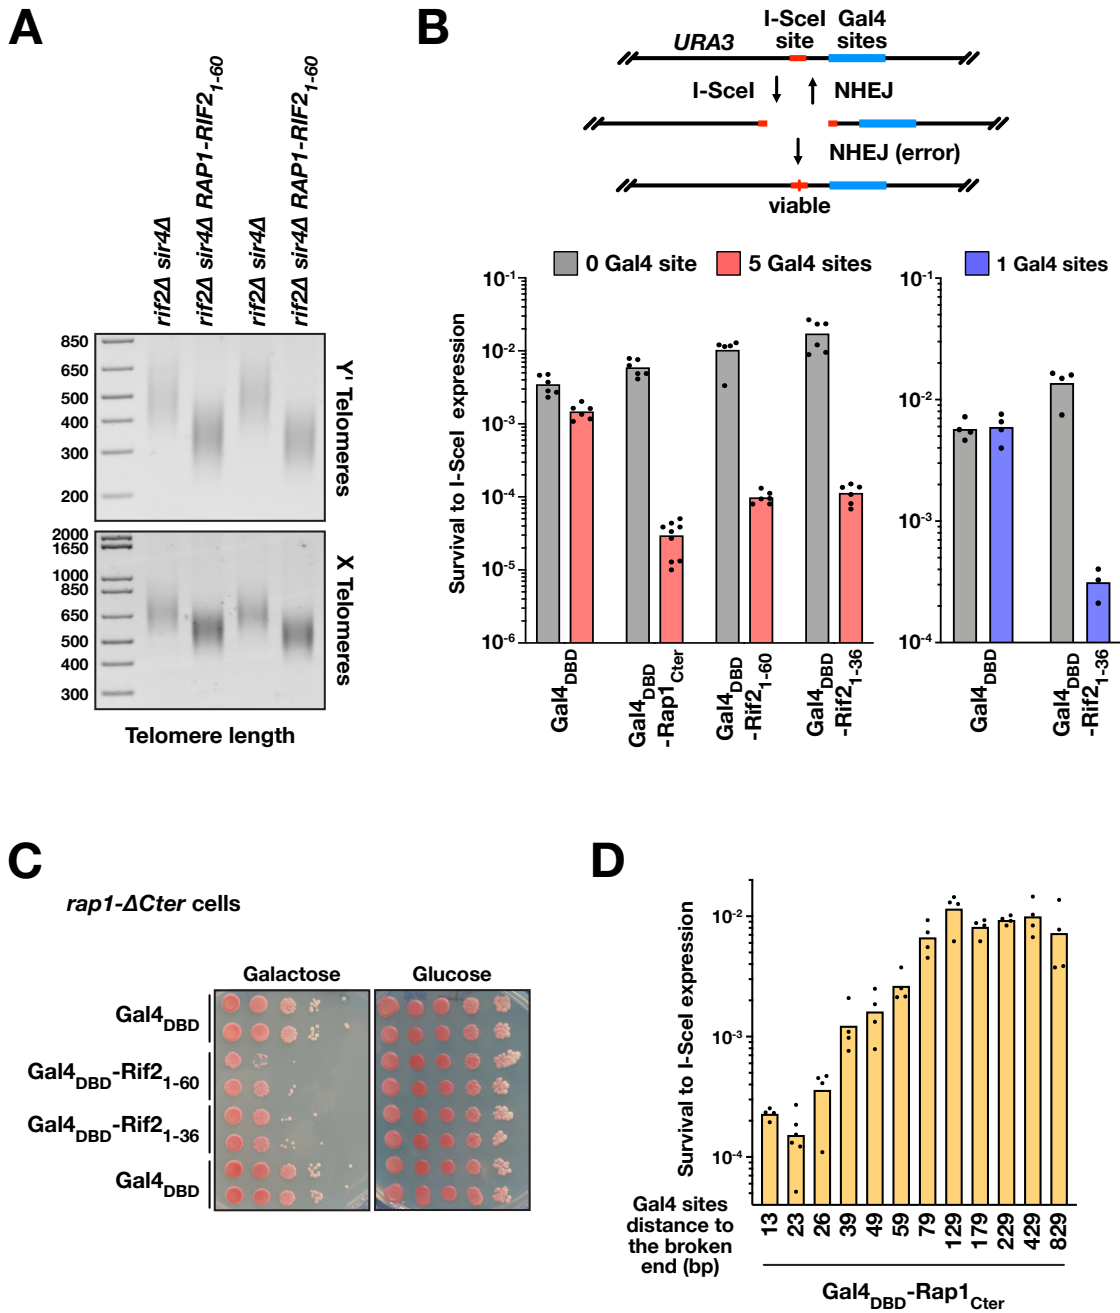

**Supplementary Figure 2.** (A) Fusing Rif2 N-terminal region to Rap1 C-terminal end (*RAP1-RIF2<sub>1-60</sub>*) shortens telomere in cells lacking Rif2 and Sir4. Y' and X telomeres amplified by PCR. TG<sub>1-3</sub> repeats length is the size of the amplified fragments minus 140 bp for Y' telomeres and minus 360 bp for X telomeres. (B) Top panel: single-site I-SceI assay used to estimate NHEJ efficiency. One I-SceI site is inserted downstream of the endogenous *URA3* gene. In survivors to continuous I-SceI expression, NHEJ-dependent mutations of the I-SceI site prevent further cleavage. Bottom panel: NHEJ inhibition by Rap1 C-terminal domain and Rif2 N-terminal region targeted at broken ends using the single-site I-SceI assay. Means from independent cell cultures. (C) NHEJ inhibition by Rif2 N-terminal region in cells lacking Rap1 C-terminal domain (*rap1-Δ670-807*) using the two-sites I-SceI assay. In this *rap1* mutant context, relative survival to I-SceI continuous expression is increased, perhaps a consequence of slow growth and of a reduced I-SceI expression. (D) Increasing distances between the broken end and the Gal4 binding sites decrease NHEJ inhibition by Rap1 C-terminal domain (two-sites I-SceI assay). Means from independent cell cultures.

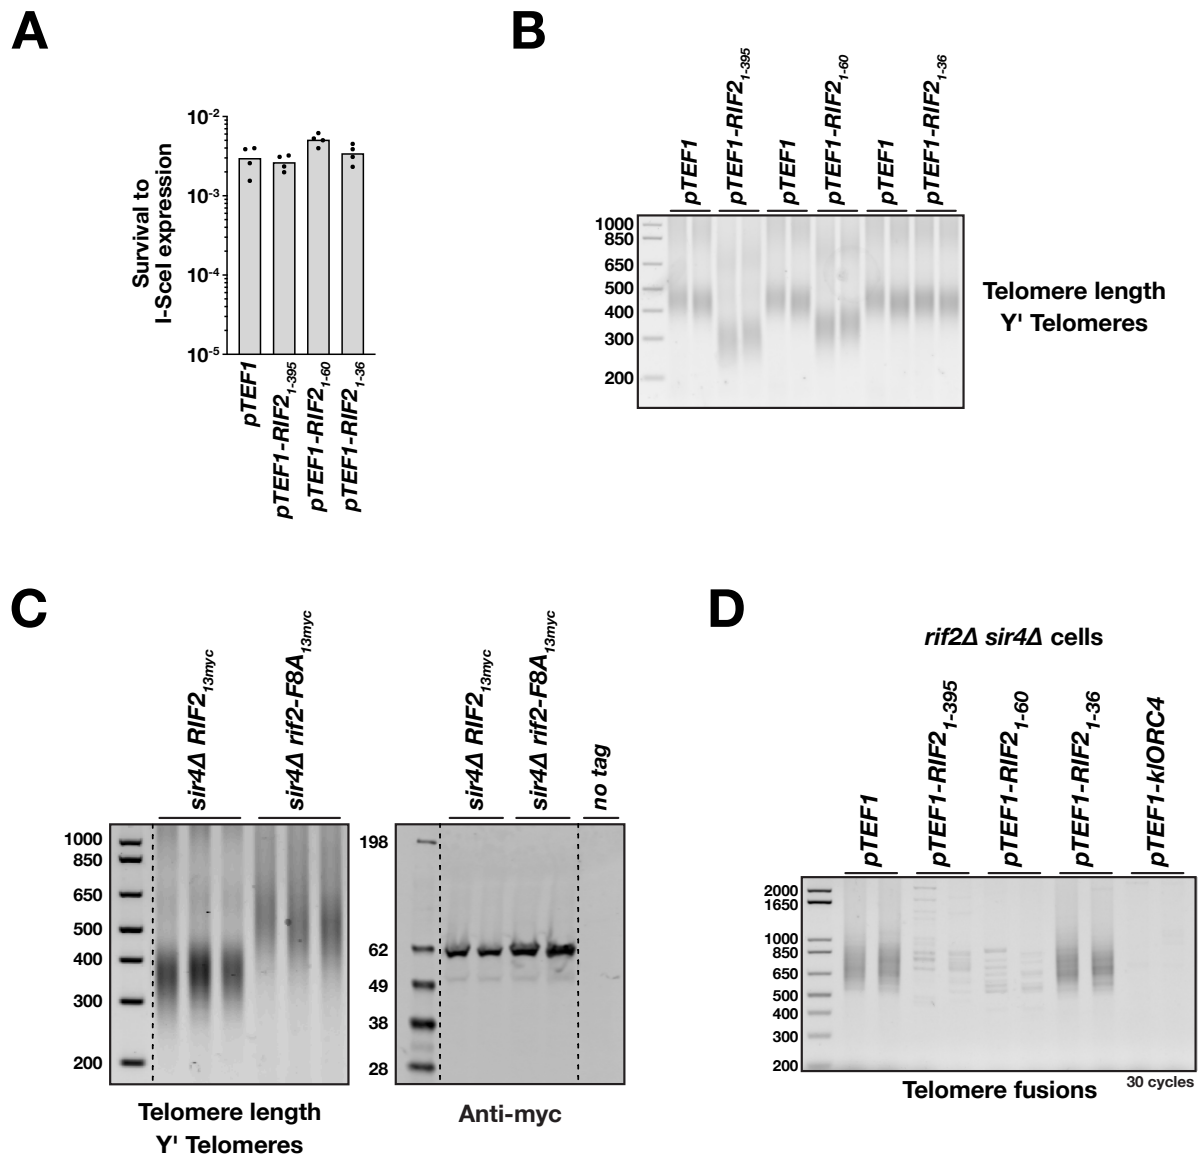

**Supplementary Figure 3.** (A) Rif2 overexpression does not challenge NHEJ at broken ends (two-sites I-SceI assay). Means from independent cell cultures. (B) Rif2 overexpression (full length and 1-60 fragment) shortens telomeres (Y' telomeres amplified by PCR). (C) Left panel: elongation in *rif2-F8A* cells lacking Sir4 (Y' telomeres amplified by PCR) (Kaizer *et al.* 2015). Right panel: the *rif2-F8A* mutation does not lower Rif2 protein level (9E10 anti-myc western blot) (Kaizer *et al.* 2015). (D) Rif2 (full length and 1-60 fragment) and kIORC4 overexpression protect telomeres against NHEJ-dependent fusions in cells lacking Rif2 and Sir4 (fusions between X and Y' telomeres).

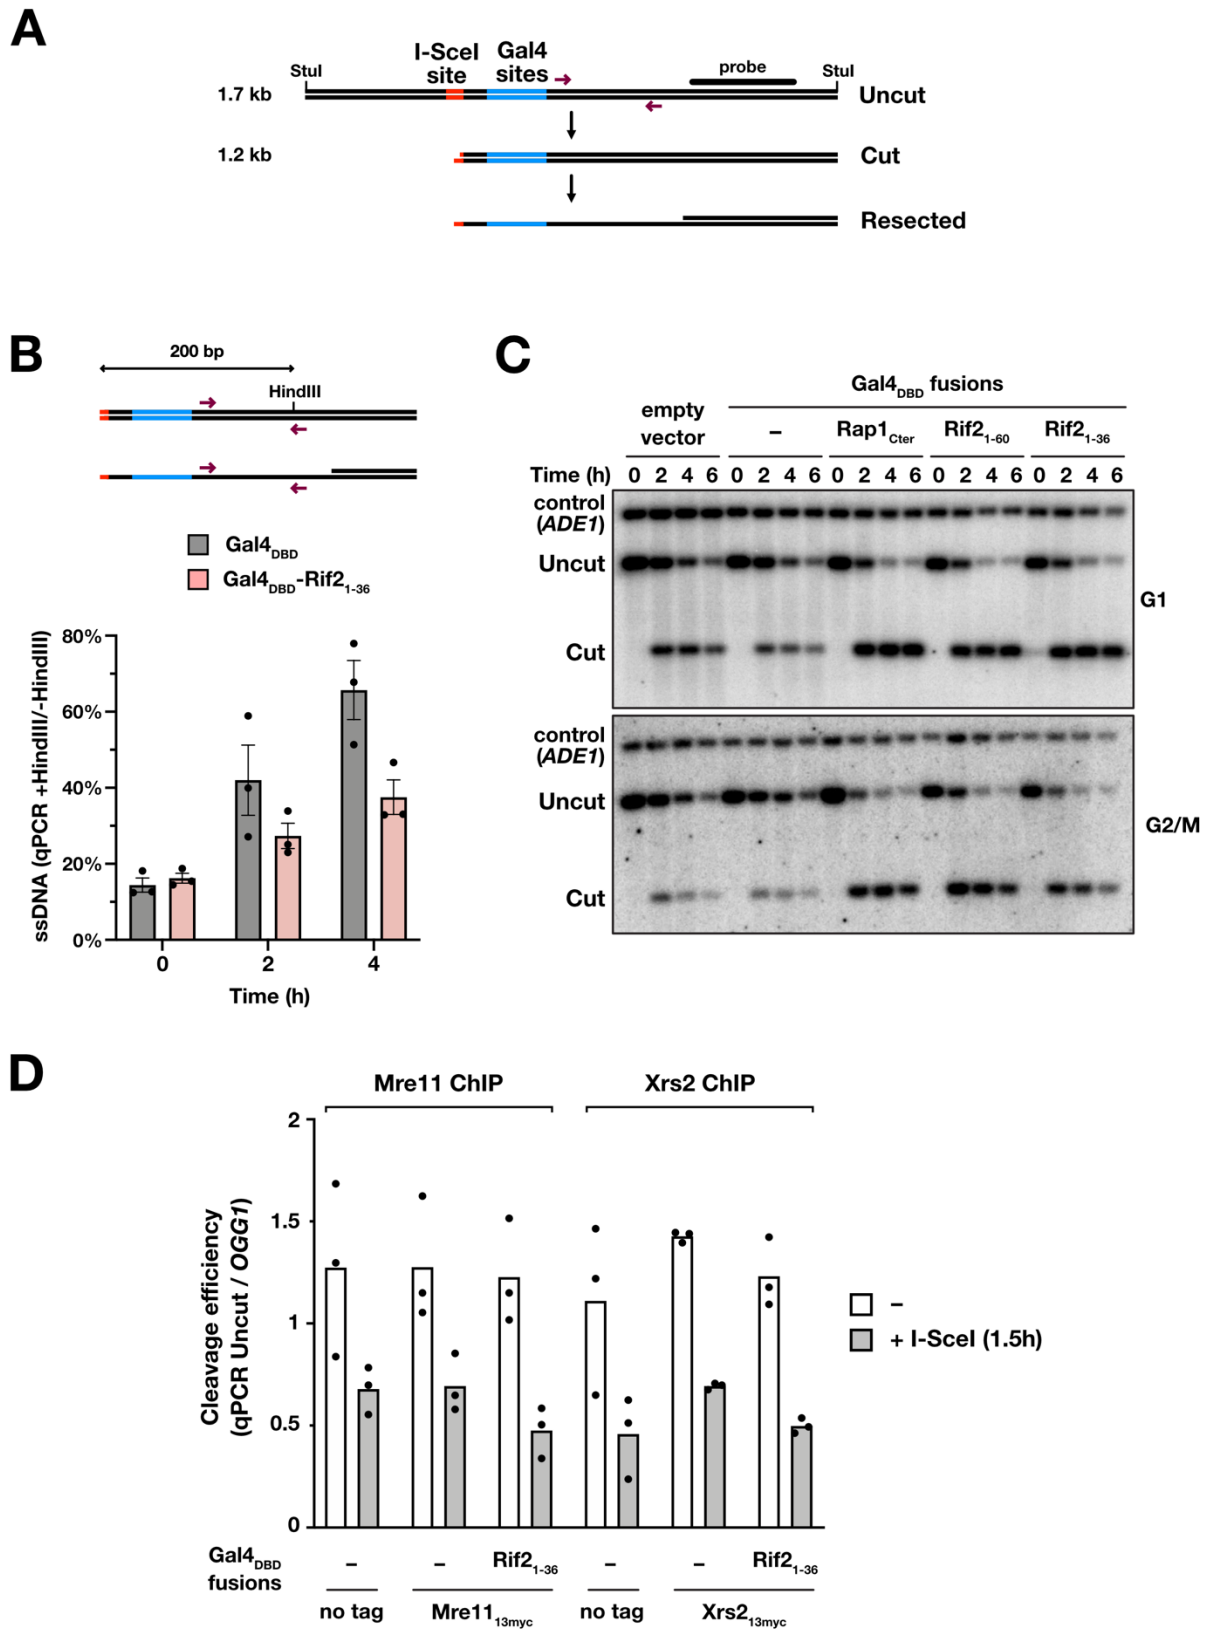

**Supplementary Figure 4.** (A) I-SceI resection assay and position of the primers used for the ChIP qPCR of the main Figure 3B (B) Single-strand (HindIII-resistant) quantification by qPCR (Zierhut and Diffley 2008 *EMBOJ* 27:1875). Means and SEM from independent samples. (C) Rap1 C-terminal domain and Rif2 N-terminal region stabilises broken ends in NHEJ-deficient cells lacking Lif1. The stability of I-SceI-induced broken ends with 5 Gal4 sites determined by Southern blot in G1 and/or G2/M arrested cells. (D) I-SceI cleavage efficiency in the ChIP samples of the main Figure 3B. Means from independent samples.





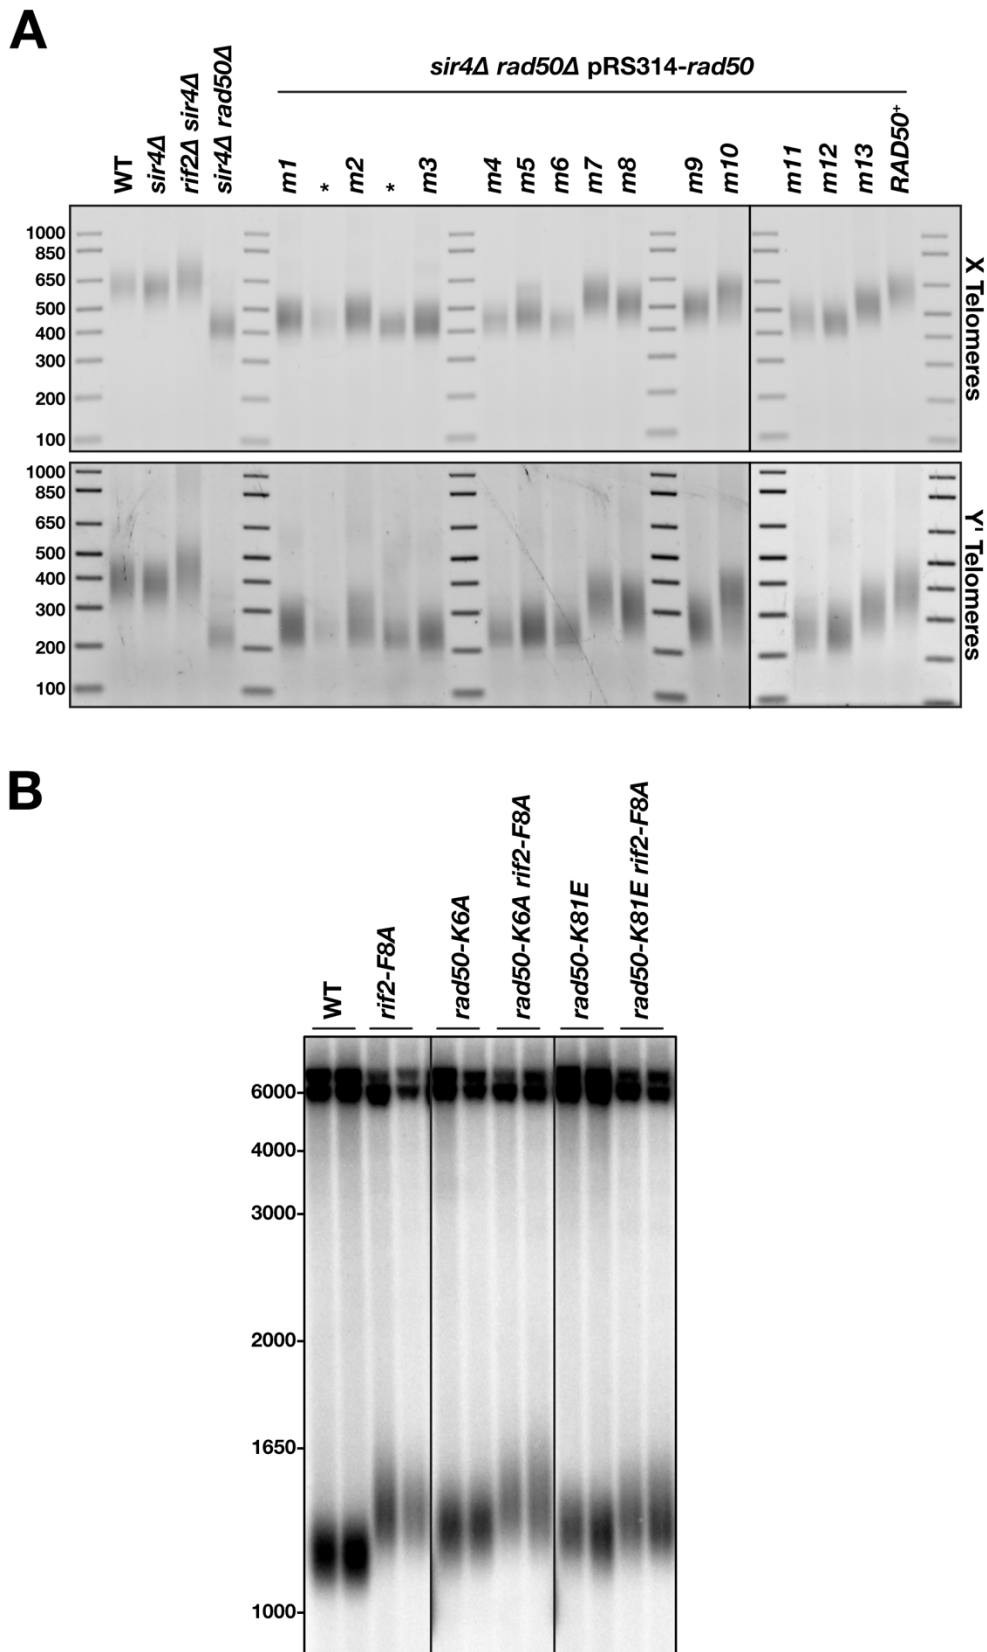

**Supplementary Figure 6.** (A) Telomere length phenotype of the screened *rad50* alleles increasing the frequency of chromosome fusions in cells lacking Sir4. Y' and X telomeres amplified by PCR. (B) Impact on telomere length of mutants *rad50-K6A* and *rad50-K81E* in cells harbouring the *rif2-F8A* allele (Southern blot, Y' probe, XhoI digest).

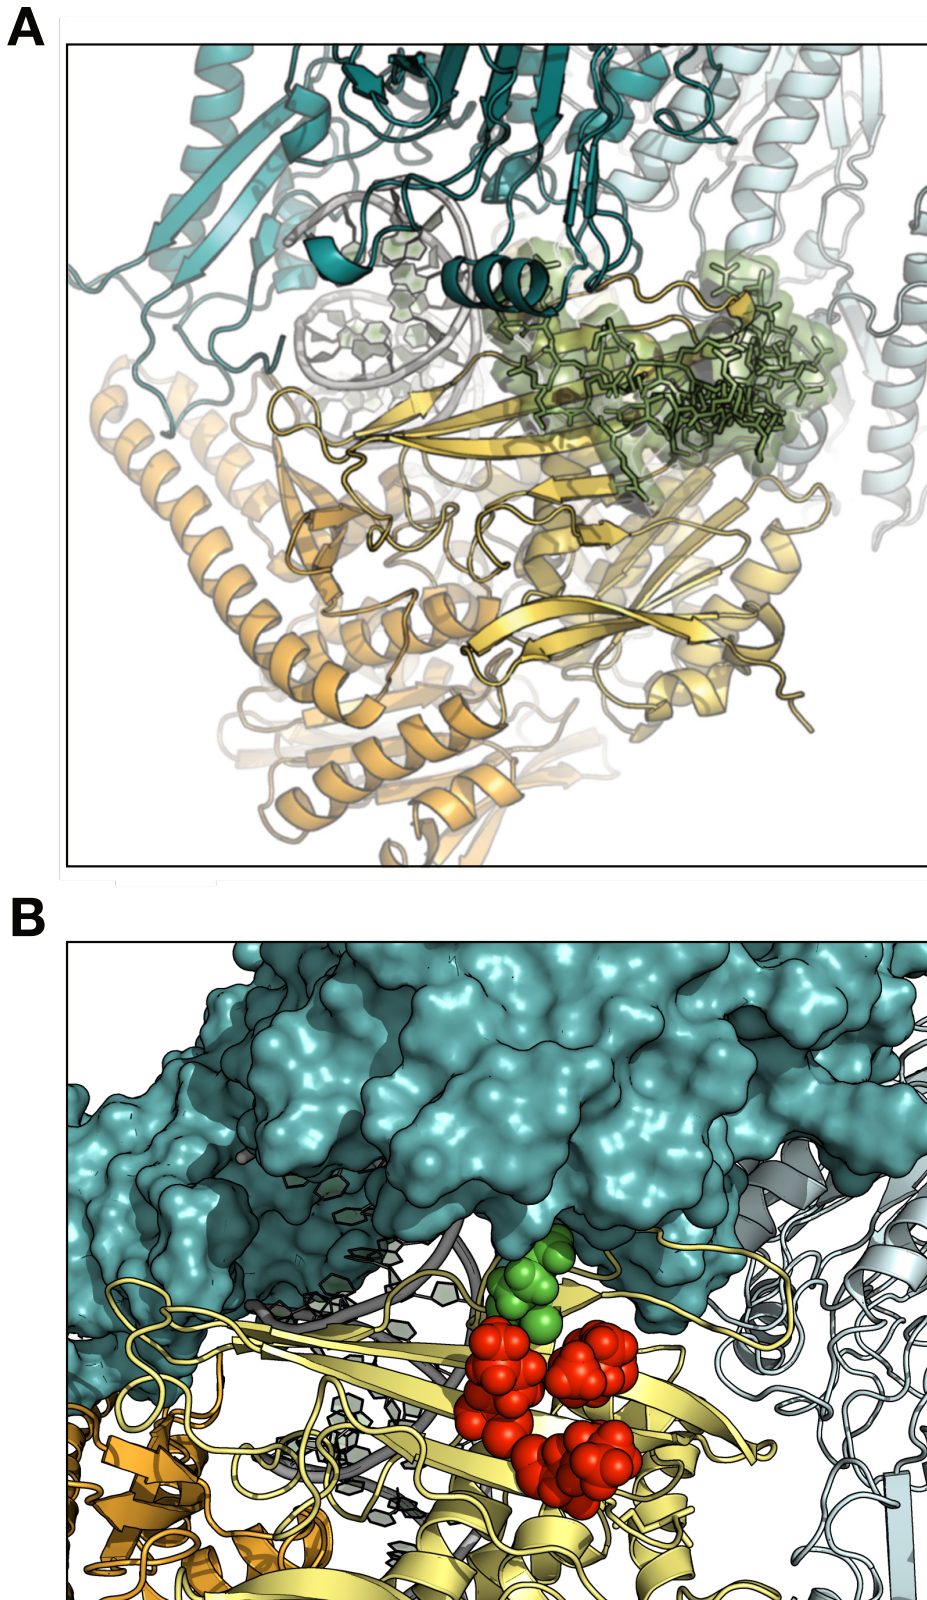

**Supplementary Figure 7.** (A) Envelope of the BAT core peptide (Rif2 residues 4-14, in green) belonging to the Haddock cluster 2 shown after superimposition of the Rad50 structures of the clusters on that of the DNA-bound Rad50-Mre11 complex model. (B) Models of *S. cerevisiae* Rad50-Mre11 complex in the DNA-bound active state (Rad50 orange/yellow, Mre11 teal/light blue). Rad50 Q115 residue highlighted in green. Rad50 residues K6, K81 and I93 highlighted in red.

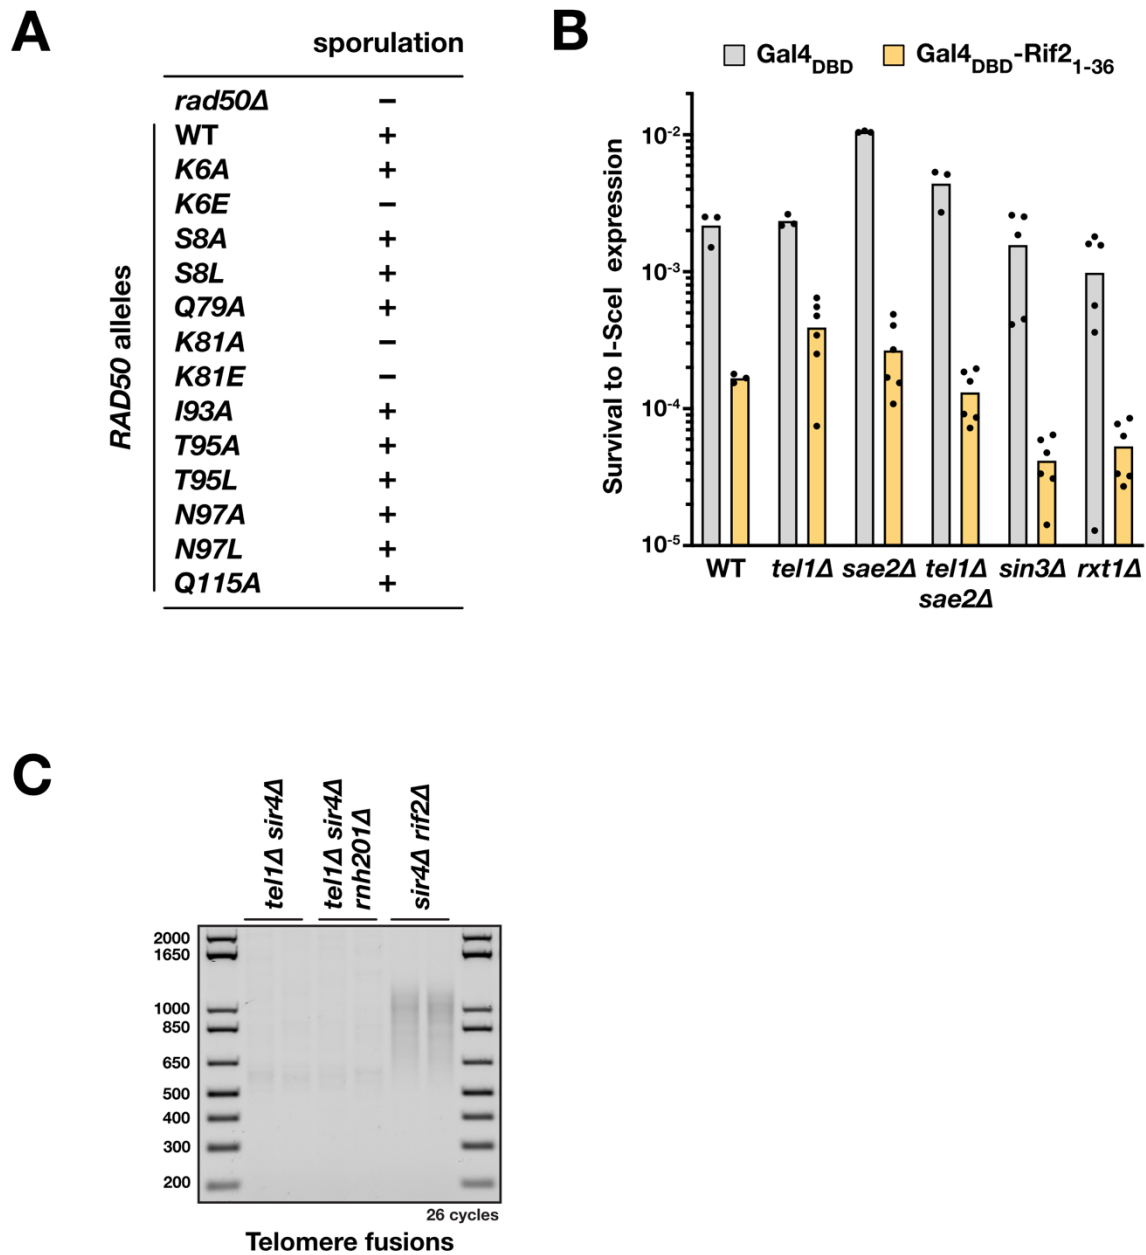

**Supplementary Figure 8.** (A) Sporulation of *rad50Δ/rad50Δ* diploid cells complemented with *rad50* alleles expressed from a *CEN/ARS* plasmid (pRS314). (B) Rif2 BAT motif inhibits NHEJ at broken ends in cells lacking Tel1, Sae2 and Rpd3L subunits Sin3 and Rxt1. Two-sites I-SceI assay. Means from independent cell cultures. (C) Rnh201 loss does not increase the frequency of telomere fusions in cells lacking Tel1 and Sir4. Fusions between X and Y' telomeres.
