# Supplementary material for: Mechanism of MRX inhibition by Rif2 at telomeres
Source: PubMed Central journal article supplement (PMC8115599; doi:10.1038/s41467-021-23035-w), 2021-05-12
Supplement: 41467_2021_23035_MOESM3_ESM.pdf [file 41467_2021_23035_MOESM3_ESM.pdf]

## **Description of Additional Supplementary Files**

File Name: Supplementary Data 1

Description: List of strains, plasmids and primers used in this study.
